# Supplementary material for: Effects of Message Framing, Sender Authority, and Recipients’ Self-Reported Trait Autonomy on Endorsement of Health and Safety Measures during the Early COVID-19 Pandemic
Source: MDPI journal article supplement (doi:10.3390/ijerph18157740), 2021-07-21
Supplement: s1 [file s1]

## Supplementary Materials

**Table S1.** Trait autonomy items and item source.

| item text                                                                                                                     | inverted | item source                                                                                                                                                                                                                                                                                 |
|-------------------------------------------------------------------------------------------------------------------------------|----------|---------------------------------------------------------------------------------------------------------------------------------------------------------------------------------------------------------------------------------------------------------------------------------------------|
| If I get into trouble, it is my own fault even if someone else told me to do it.                                              | -        | Black, J. E. (2016). An introduction to the moral agency scale. <i>Social Psychology</i> . <a href="https://doi.org/10.1027/1864-9335/a000284">https://doi.org/10.1027/1864-9335/a000284</a>                                                                                                |
| I make up my own mind about doing good or bad things.                                                                         | -        |                                                                                                                                                                                                                                                                                             |
| I am just as at fault for breaking the rules when no one knows as when everyone knows.                                        | -        |                                                                                                                                                                                                                                                                                             |
| I am the one responsible for my own behavior, good and bad.                                                                   | -        |                                                                                                                                                                                                                                                                                             |
| I feel responsible for the consequences of my actions.                                                                        | -        |                                                                                                                                                                                                                                                                                             |
| Most of the time I can tell how my actions are going to affect others                                                         | -        |                                                                                                                                                                                                                                                                                             |
| In most cases, I can make my own decisions about what is right or wrong in a situation.                                       | -        |                                                                                                                                                                                                                                                                                             |
| If I feel pressured into doing something, I'm not as responsible as when I decide on my own                                   | yes      |                                                                                                                                                                                                                                                                                             |
| No one can make me do something I know to be wrong.                                                                           | -        |                                                                                                                                                                                                                                                                                             |
| My actions in most situations are based on what other people tell me is the right thing to do.                                | yes      | Becker, P. (1989). Der Trierer Persönlichkeitsfragebogen (TPF). <i>Handanweisung</i> . Göttingen: Hogrefe.                                                                                                                                                                                  |
| I find it hard to make decisions on my own.                                                                                   | yes      |                                                                                                                                                                                                                                                                                             |
| When I have a difficult problem to solve, I ask someone to help me.                                                           | yes      |                                                                                                                                                                                                                                                                                             |
| I lean on stronger people.                                                                                                    | yes      |                                                                                                                                                                                                                                                                                             |
| I like to make important decisions alone.                                                                                     | -        |                                                                                                                                                                                                                                                                                             |
| I want to take responsibility for my life alone.                                                                              | -        |                                                                                                                                                                                                                                                                                             |
| I like to go my own way.                                                                                                      | -        | Laux, L. & Renner, K.-H. (2002). Self-Monitoring und Authentizität: Die verkannten Selbstdarsteller. <i>Zeitschrift für Differentielle und Diagnostische Psychologie</i> , 23, 129-148. <a href="https://doi.org/10.1024/0170-1789.23.2.129">https://doi.org/10.1024/0170-1789.23.2.129</a> |
| It is my feeling that if everyone else in a group is behaving in a certain manner, this must be the proper way to behave.     | yes      |                                                                                                                                                                                                                                                                                             |
| When I am uncertain how to act in a social situation, I look to the behavior of others for cues.                              | yes      |                                                                                                                                                                                                                                                                                             |
| I try to pay attention to the reactions of others to my behavior in order to avoid being out of place.                        | yes      |                                                                                                                                                                                                                                                                                             |
| The slightest look of disapproval in the eyes of a person with whom I am interacting is enough to make me change my approach. | yes      |                                                                                                                                                                                                                                                                                             |
| It's important to me to fit in to the group I'm with.                                                                         | yes      |                                                                                                                                                                                                                                                                                             |
| My behavior often depends on how I feel others wish me to behave.                                                             | yes      |                                                                                                                                                                                                                                                                                             |

### Exploratory Analysis on socio-demographics

To examine the possible influence of socio-demographic variables, we calculated a hierarchical regression. We calculated a regression using age, gender and education as predictors for the absolute shift. Then conducted a hierarchical regression: in the first step we used the significant predictors and then step wise added the predictors autonomy, sender and message. We first conducted this analysis for the absolute pre-post differences across all seven items (Table S2) and then only for item 5 (Table S3).

**Table S2.** Hierarchical regression results using absolute pre-post differences (averaged across all seven items) as the criterion, with correction of ceiling effects.

|                           | $\Delta R^2$ | $b$      | $b$ 95% CI      | $p$         |
|---------------------------|--------------|----------|-----------------|-------------|
| step 0                    | 0.01         |          |                 | 0.19        |
| constant                  |              | 0.63     | [0.17, 1.10]    | <.01        |
| age                       |              | 0.001    | [-0.001, 0.005] | 0.24        |
| gender                    |              | -0.10    | [-0.21, -0.001] | <b>0.05</b> |
| education                 |              | 0.01     | [-0.03, 0.05]   | 0.68        |
| step 1                    | 0.01         |          |                 | 0.07        |
| constant                  |              | 0.7<br>6 | [0.62, 0.91]    | <.001       |
| gender                    |              | -0.09    | [-0.19, 0.01]   | 0.07        |
| step 2                    | 0.03         |          |                 | <.001       |
| constant                  |              | 1.0<br>5 | [0.49, 1.61]    | <.001       |
| gender                    |              | -0.09    | [-0.19, 0.00]   | 0.07        |
| autonomy                  |              | -0.07    | [-0.23, 0.07]   | .30         |
| step 3                    | 0.01         |          |                 | .40         |
| constant                  |              | 1.06     | [0.49, 1.62]    | <0.01       |
| gender                    |              | -0.09    | [-0.00,-0.00]   | 0.07        |
| autonomy                  |              | -0.07    | [-0.23, 0.07]   | 0.31        |
| sender<br>(social worker) |              | 0.0<br>1 | [-0.16, 0.11]   | 0.81        |
| message (moral)           |              | -0.04    | [-0.16, 0.07]   | 0.48        |
| message (control)         |              | -0.00    | [-0.12, 0.12]   | 0.98        |

*Note.*  $b$  represents unstandardized regression weights. Square brackets are used to enclose the lower and upper limits of a confidence interval.

**Table S3.** Hierarchical regression results using absolute pre-post differences for item 5 as the criterion (the one item that showed no ceiling effect).

|                           | $\Delta R^2$ | $b$   | $b$ 95% CI     | $p$              |
|---------------------------|--------------|-------|----------------|------------------|
| step 0                    | 0.04         |       |                | <0.001           |
| constant                  |              | 0.66  | [0.02, 1.31]   | 0.04             |
| age                       |              | -0.01 | [-0.01, -0.00] | <b>&lt;0.001</b> |
| gender                    |              | -0.18 | [-0.32, -0.04] | <b>0.02</b>      |
| education                 |              | 0.05  | [-0.01, 0.12]  | 0.08             |
| step 1                    | 0.03         |       |                | 0.07             |
| constant                  |              | 1.19  | [0.96, 1.43]   | <b>&lt;0.001</b> |
| age                       |              | -0.01 | [-0.01, -0.00] | <b>&lt;0.001</b> |
| gender                    |              | -0.19 | [-0.34, -0.04] | <b>0.01</b>      |
| step 2                    | 0.04         |       |                | <0.001           |
| constant                  |              | 2.05  | [1.26, 2.84]   | <0.001           |
| age                       |              | -0.01 | [-0.01, -0.00] | <b>&lt;0.001</b> |
| gender                    |              | -0.19 | [-0.34, -0.04] | <b>0.01</b>      |
| autonomy                  |              | -0.24 | [-0.46, -0.02] | <b>0.03</b>      |
| step 3                    | 0.04         |       |                | <0.001           |
| constant                  |              | 2.12  | [1.31, 2.92]   | <0.001           |
| age                       |              | -0.01 | [-0.01, -0.00] | <b>&lt;0.01</b>  |
| gender                    |              | -0.19 | [-0.34, -0.04] | <b>&lt;0.01</b>  |
| autonomy                  |              | -0.25 | [-0.47, -0.03] | <b>0.02</b>      |
| sender<br>(social worker) |              | -0.01 | [-0.16, 0.12]  | 0.84             |
| message (moral)           |              | -0.09 | [-0.26, 0.08]  | 0.28             |
| message (control)         |              | -0.05 | [-0.23, 0.11]  | 0.49             |

*Note.*  $b$  represents unstandardized regression weights. Square brackets are used to enclose the lower and upper limits of a confidence interval.

**Table S4.** ANOVA results on single item level, without and with correction of ceiling effect.

|                                               | <i>F(df, dfd)</i>                    | <i>p</i>    | <i>η<sup>2</sup></i> |
|-----------------------------------------------|--------------------------------------|-------------|----------------------|
| item 1 - without correction of ceiling effect |                                      |             |                      |
| message                                       | $F(2,701) = 0.75$                    | 0.47        | 0.00                 |
| sender                                        | $F(1,701) = 2.25$                    | 0.13        | 0                    |
| measurement                                   | $F(1,701) = 3.25$                    | 0.07        | 0                    |
| message:sender                                | $F(2,701) = 0.15$                    | 0.86        | 0                    |
| message:measurement                           | $F(2,701) = 0.27$                    | 0.76        | 0                    |
| sender:measurement                            | $F(1,701) = 0.42$                    | 0.52        | 0                    |
| message:sender:measurement                    | $F(2,701) = 0.95$                    | 0.39        | 0                    |
| item 1 - with correction of ceiling effect    |                                      |             |                      |
| message                                       | $F(2,295) = 2.46$                    | 0.09        | 0                    |
| sender                                        | $F(1,295) = 0.03$                    | 0.86        | 0                    |
| measurement                                   | <b><math>F(1,295) = 16.77</math></b> | <b>0.00</b> | <b>0</b>             |
| message:sender                                | $F(2,295) = 0.03$                    | 0.97        | 0                    |
| message:measurement                           | $F(2,295) = 0.61$                    | 0.54        | 0                    |
| sender:measurement                            | $F(1,295) = 3.79$                    | 0.05        | 0                    |
| message:sender:measurement                    | $F(2,295) = 0.02$                    | 0.98        | 0                    |
| item 2 - without correction of ceiling effect |                                      |             |                      |
| message                                       | $F(2,701) = 0.03$                    | 0.97        | 0                    |
| sender                                        | $F(1,701) = 0.53$                    | 0.47        | 0                    |
| measurement                                   | <b><math>F(1,701) = 9.44</math></b>  | <b>0.00</b> | <b>0</b>             |
| message:sender                                | $F(2,701) = 0.69$                    | 0.50        | 0                    |
| message:measurement                           | $F(2,701) = 2.24$                    | 0.11        | 0                    |
| sender:measurement                            | $F(1,701) = 0.41$                    | 0.52        | 0                    |
| message:sender:measurement                    | $F(2,701) = 0.84$                    | 0.43        | 0                    |
| item 2 -with correction of ceiling effect     |                                      |             |                      |
| message                                       | $F(2,217) = 1.89$                    | 0.15        | 0                    |
| sender                                        | $F(1,217) = 0.02$                    | 0.89        | 0                    |
| measurement                                   | <b><math>F(1,217) = 45.61</math></b> | <b>0.00</b> | <b>0.05</b>          |
| message:sender                                | $F(2,217) = 0.73$                    | 0.48        | 0                    |
| message:measurement                           | $F(2,217) = 1.16$                    | 0.32        | 0                    |
| sender:measurement                            | $F(1,217) = 0.01$                    | 0.92        | 0                    |
| message:sender:measurement                    | $F(2,217) = 1.89$                    | 0.15        | 0                    |
| item 3 - without correction of ceiling effect |                                      |             |                      |
| message                                       | $F(2,701) = 2.22$                    | 0.11        | 0                    |
| sender                                        | $F(1,701) = 0.17$                    | 0.68        | 0                    |
| measurement                                   | <b><math>F(1,701) = 20.38</math></b> | <b>0.00</b> | <b>0.01</b>          |
| message:sender                                | $F(2,701) = 2.18$                    | 0.11        | 0                    |
| message:measurement                           | $F(2,701) = 0.76$                    | 0.47        | 0                    |
| sender:measurement                            | $F(1,701) = 1.11$                    | 0.29        | 0                    |
| message:sender:measurement                    | <b><math>F(2,701) = 3.29</math></b>  | <b>0.04</b> | <b>0</b>             |
| item 3 - with correction of ceiling effect    |                                      |             |                      |
| message                                       | $F(2,147) = 1.66$                    | 0.19        | 0.02                 |
| sender                                        | $F(1,147) = 0.28$                    | 0.60        | 0                    |
| measurement                                   | <b><math>F(1,147) = 9.44</math></b>  | <b>0.00</b> | <b>0.02</b>          |
| message:sender                                | $F(2,147) = 0.15$                    | 0.86        | 0                    |
| message:measurement                           | $F(2,147) = 0.74$                    | 0.48        | 0                    |
| sender:measurement                            | $F(1,147) = 0.11$                    | 0.74        | 0                    |
| message:sender:measurement                    | $F(2,147) = 1.42$                    | 0.24        | 0                    |
| item 4 - without correction of ceiling effect |                                      |             |                      |
| message                                       | $F(2,701) = 1.71$                    | 0.18        | 0                    |
| sender                                        | $F(1,701) = 0.56$                    | 0.46        | 0                    |
| measurement                                   | $F(1,701) = 0.25$                    | 0.62        | 0                    |
| message:sender                                | $F(2,701) = 1.91$                    | 0.15        | 0                    |
| message:measurement                           | $F(2,701) = 0.15$                    | 0.86        | 0                    |
| sender:measurement                            | <b><math>F(1,701) = 4.05</math></b>  | <b>0.04</b> | <b>0</b>             |
| message:sender:measurement                    | $F(2,701) = 1.06$                    | 0.34        | 0                    |

|                                               | <i>F(df, dfd)</i>        | <i>p</i>    | <i>η</i> <sup>2</sup> |
|-----------------------------------------------|--------------------------|-------------|-----------------------|
| item 4 - with correction of ceiling effect    |                          |             |                       |
| message                                       | F(2,323) = 2.82          | 0.06        | 0                     |
| sender                                        | F(1,323) = 3.08          | 0.08        | 0.01                  |
| measurement                                   | <b>F(1,323) = 21.80</b>  | <b>0.00</b> | <b>0</b>              |
| message:sender                                | F(2,323) = 1.56          | 0.21        | 0.01                  |
| message:measurement                           | F(2,323) = 0.53          | 0.59        | 0                     |
| sender:measurement                            | F(1,323) = 5.02          | 0.03*       | 0                     |
| message:sender:measurement                    | F(2,323) = 0.54          | 0.58        | 0                     |
| item 5 - without correction of ceiling effect |                          |             |                       |
| message                                       | F(2,701) = 2.45          | 0.09        | 0.01                  |
| sender                                        | F(1,701) = 0.12          | 0.74        | 0                     |
| measurement                                   | <b>F(1,701) = 220.62</b> | <b>0.00</b> | <b>0.03</b>           |
| message:sender                                | F(2,701) = 1.14          | 0.32        | 0                     |
| message:measurement                           | F(2,701) = 0.28          | 0.76        | 0                     |
| sender:measurement                            | F(1,701) = 1.49          | 0.22        | 0                     |
| message:sender:measurement                    | F(2,701) = 1.47          | 0.23        | 0                     |
| item 5 - with correction of ceiling effect    |                          |             |                       |
| message                                       | F(2,595) = 0.79          | 0.45        | 0.00                  |
| sender                                        | F(1,595) = 0.85          | 0.36        | 0.00                  |
| measurement                                   | <b>F(1,595) = 285.08</b> | <b>0.00</b> | <b>0.08</b>           |
| message:sender                                | F(2,595) = 1.21          | 0.30        | 0.01                  |
| message:measurement                           | F(2,595) = 1.07          | 0.34        | 0                     |
| sender:measurement                            | F(1,595) = 0.96          | 0.33        | 0                     |
| message:sender:measurement                    | F(2,595) = 2.05          | 0.13        | 0                     |
| item 6 - without correction of ceiling effect |                          |             |                       |
| message                                       | F(2,701) = 0.32          | 0.72        | 0                     |
| sender                                        | F(1,701) = 2.77          | 0.10        | 0                     |
| measurement                                   | F(1,701) = 0.20          | 0.65        | 0                     |
| message:sender                                | F(2,701) = 1.35          | 0.26        | 0                     |
| message:measurement                           | F(2,701) = 1.83          | 0.16        | 0                     |
| sender:measurement                            | F(1,701) = 0.01          | 0.92        | 0                     |
| message:sender:measurement                    | F(2,701) = 0.48          | 0.62        | 0                     |
| item 6 - with correction of ceiling effect    |                          |             |                       |
| message                                       | F(2,343) = 0.01          | 0.99        | 0.00                  |
| sender                                        | F(1,343) = 0.23          | 0.63        | 0                     |
| measurement                                   | <b>F(1,343) = 14.09</b>  | <b>0.00</b> | <b>0</b>              |
| message:sender                                | F(2,343) = 0.19          | 0.83        | 0                     |
| message:measurement                           | <b>F(2,343) = 3.59</b>   | <b>0.03</b> | <b>0</b>              |
| sender:measurement                            | F(1,343) = 0.75          | 0.39        | 0                     |
| message:sender:measurement                    | F(2,343) = 0.50          | 0.61        | 0                     |
| item 7 - without correction of ceiling effect |                          |             |                       |
| message                                       | F(2,701) = 0.07          | 0.93        | 0                     |
| sender                                        | F(1,701) = 0.33          | 0.57        | 0                     |
| measurement                                   | F(1,701) = 0.54          | 0.46        | 0                     |
| message:sender                                | F(2,701) = 0.43          | 0.65        | 0                     |
| message:measurement                           | F(2,701) = 0.30          | 0.74        | 0                     |
| sender:measurement                            | F(1,701) = 0.49          | 0.49        | 0                     |
| message:sender:measurement                    | F(2,701) = 1.67          | 0.19        | 0                     |
| item 7 - with correction of ceiling effect    |                          |             |                       |
| message                                       | F(2,219) = 0.05          | 0.95        | 0.00                  |
| sender                                        | <b>F(1,219) = 4.33</b>   | <b>0.04</b> | <b>0.01</b>           |
| measurement                                   | <b>F(1,219) = 26.95</b>  | <b>0.00</b> | <b>0.03</b>           |
| message:sender                                | F(2,219) = 0.22          | 0.80        | 0                     |
| message:measurement                           | F(2,219) = 0.06          | 0.95        | 0                     |
| sender:measurement                            | F(1,219) = 0.01          | 0.91        | 0                     |
| message:sender:measurement                    | F(2,219) = 0.18          | 0.83        | 0                     |

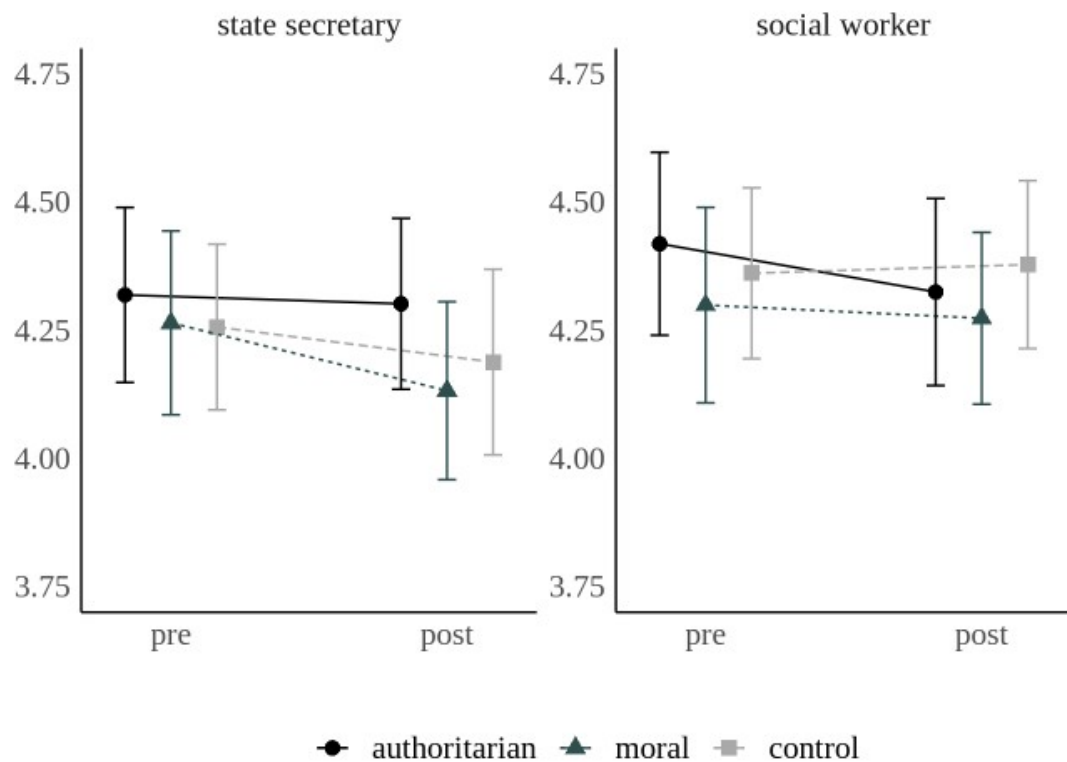

Item 1: I reduce contacts to other people outside the apartment to an absolute minimum. (*without correction of ceiling effect*)

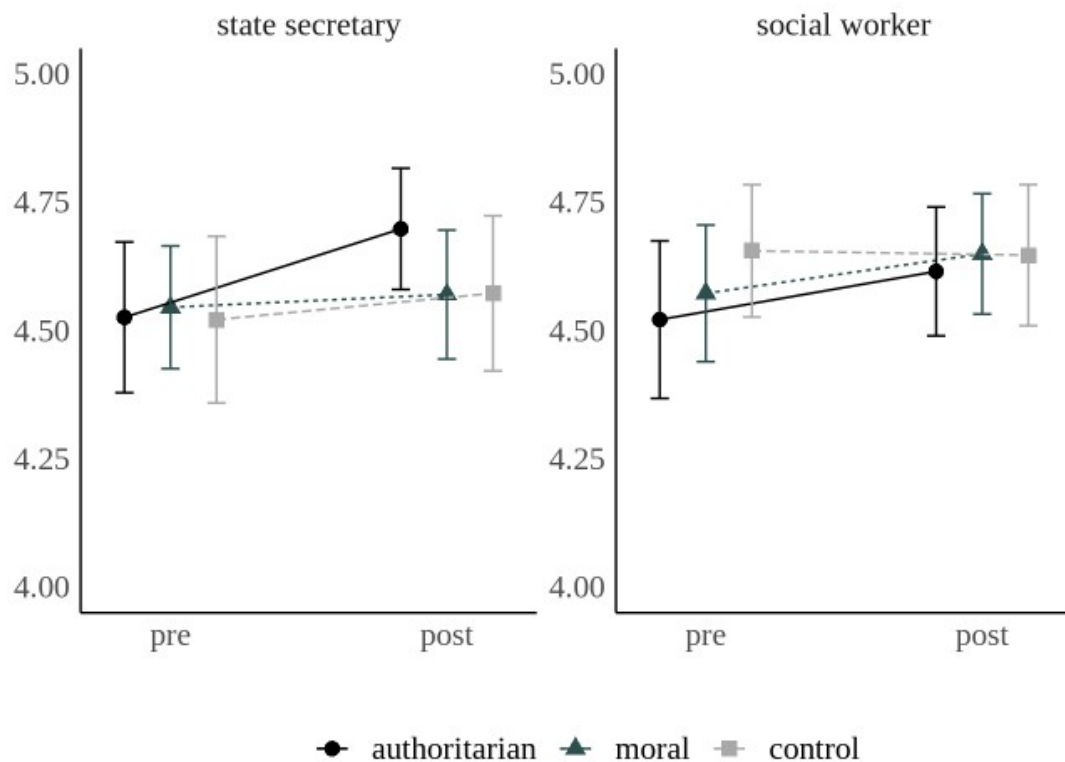

Item 2: I keep a minimum distance of 1.5 meter to other people in public wherever possible. (*without correction of ceiling effect*)

**Figure S1.** Mean ratings (95% CI) in response to the single items, without correction of the ceiling effects

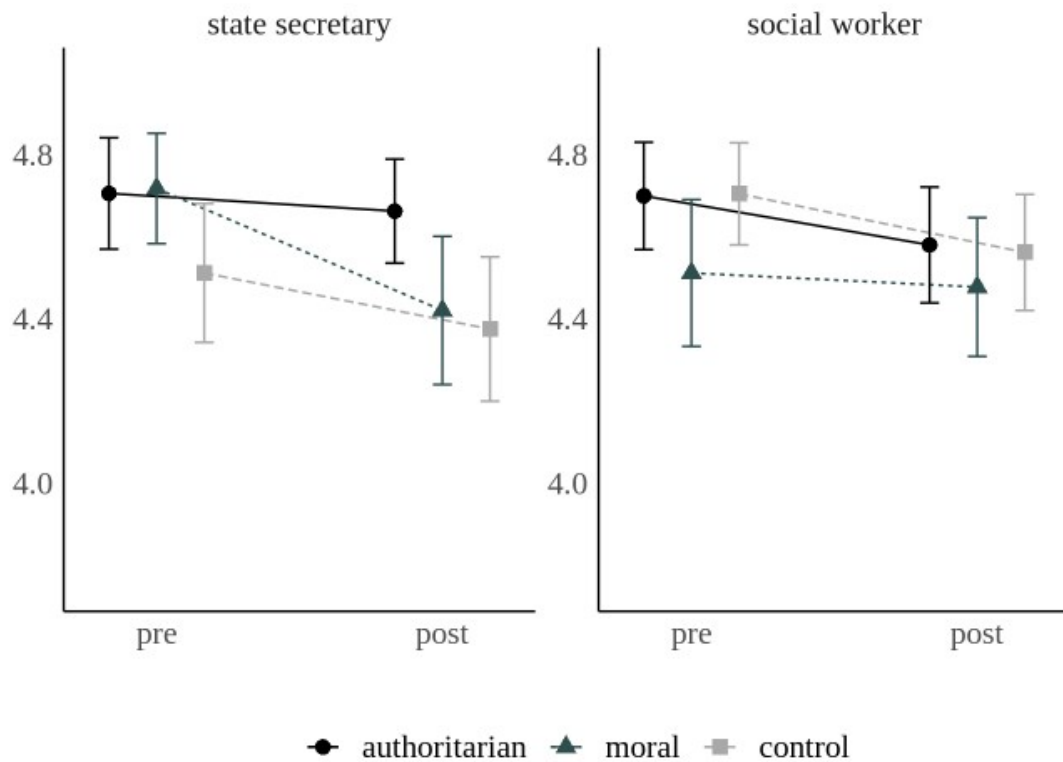

Item 3: I only spend time in public alone, with people of my household, or with one other person. (without correction of ceiling effect)

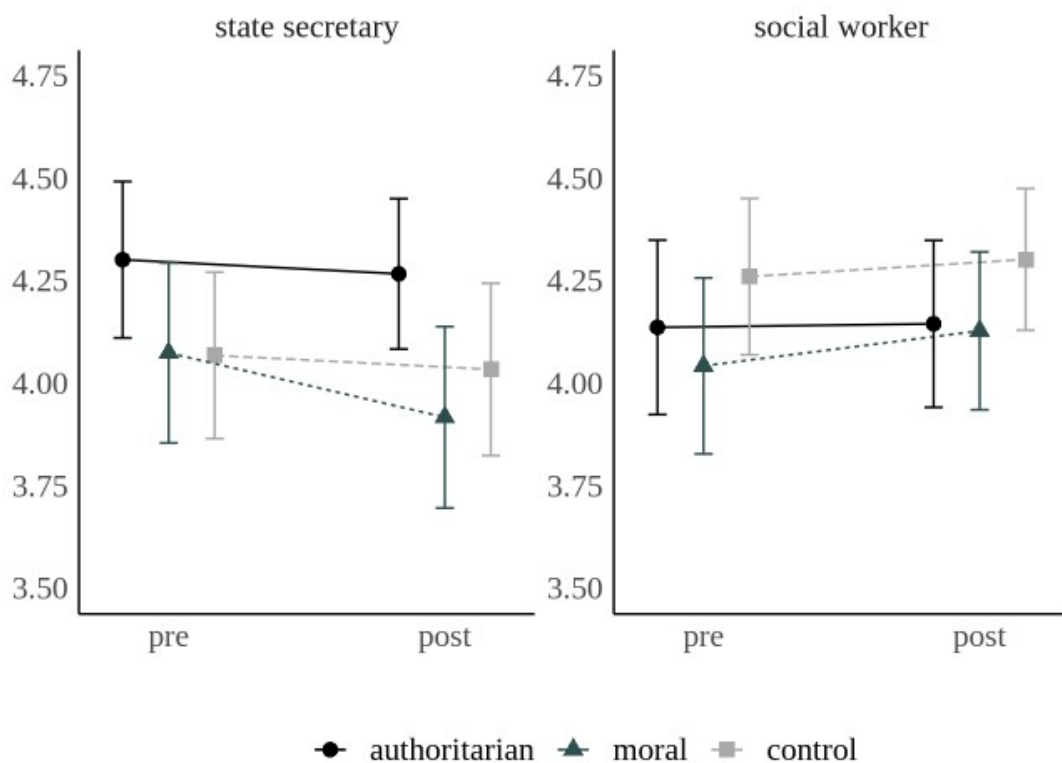

Item 4: There are only very limited reasons for me to leave the house: emergency care, important purchases, doctors visit, necessary work, meetings, exams, sport, physical activity. (without correction of ceiling effect)

**Figure S1.** Mean ratings (95% CI) in response to the single items, without correction of the ceiling effects (continued)

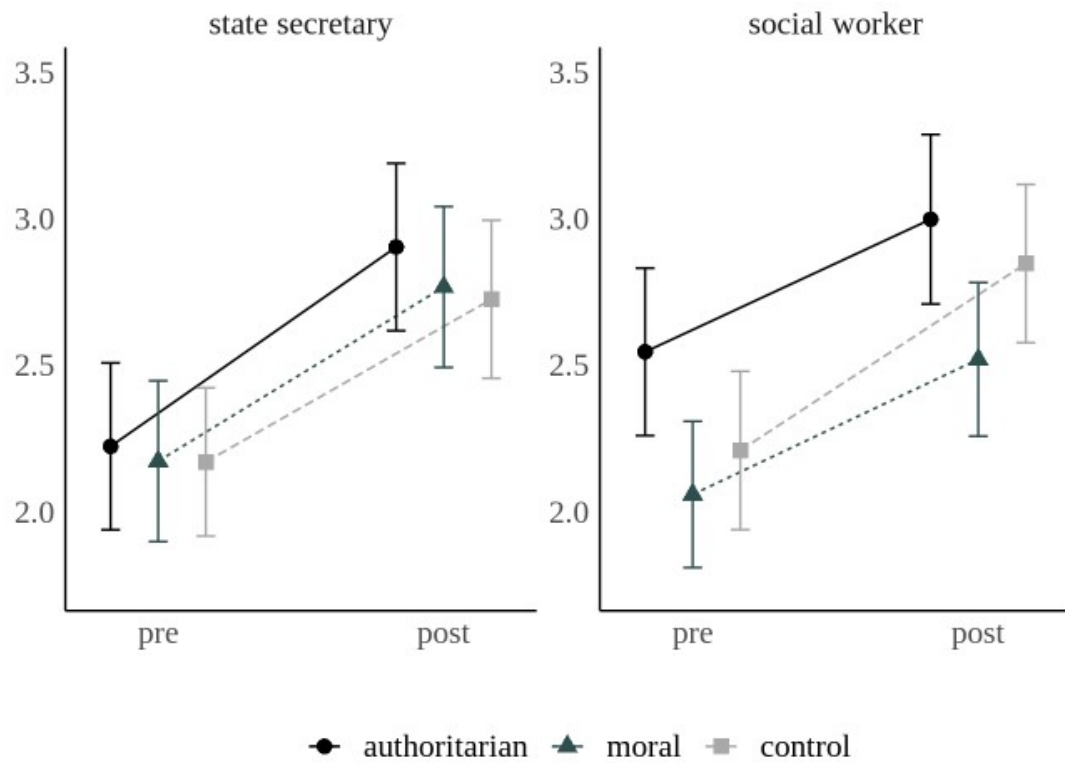

Item 5: I wear a protective mask when I am in other indoor rooms. (*without correction of ceiling effect*)

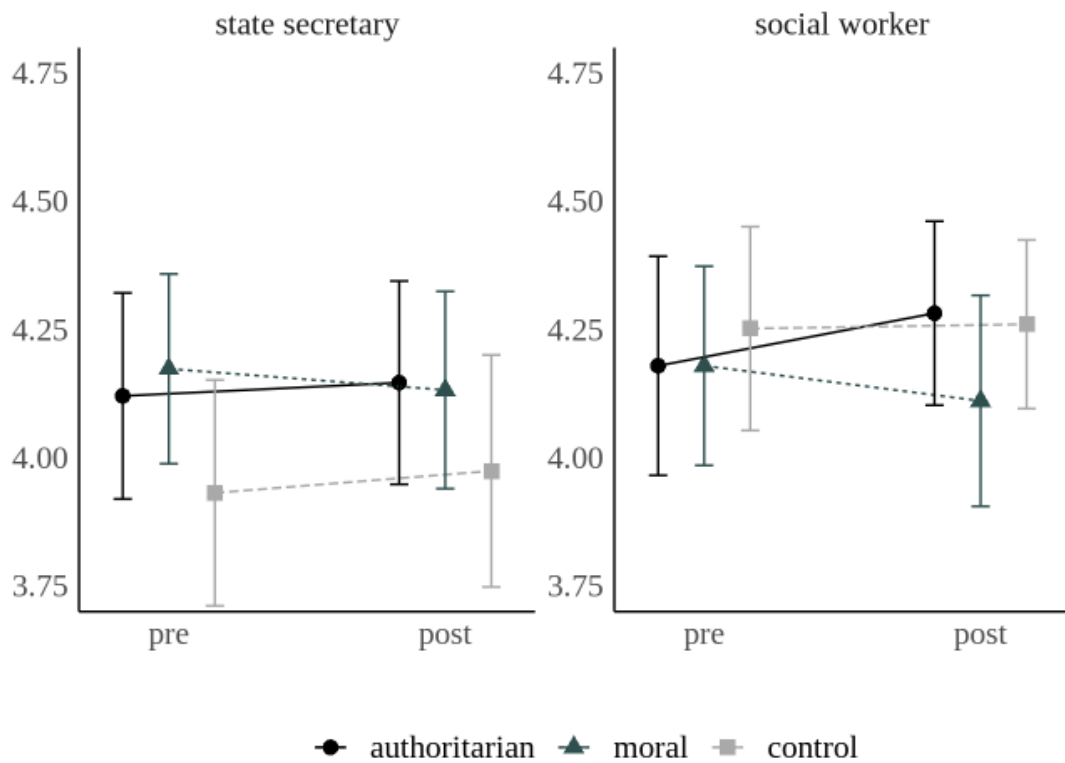

Item 6: For as long as schools and kindergartens are closed, I prevent my children from having any contacts, or I would do this if I had children. (*without correction of ceiling effect*)

**Figure S1.** Mean ratings (95% CI) in response to the single items, without correction of the ceiling effects (*continued*)

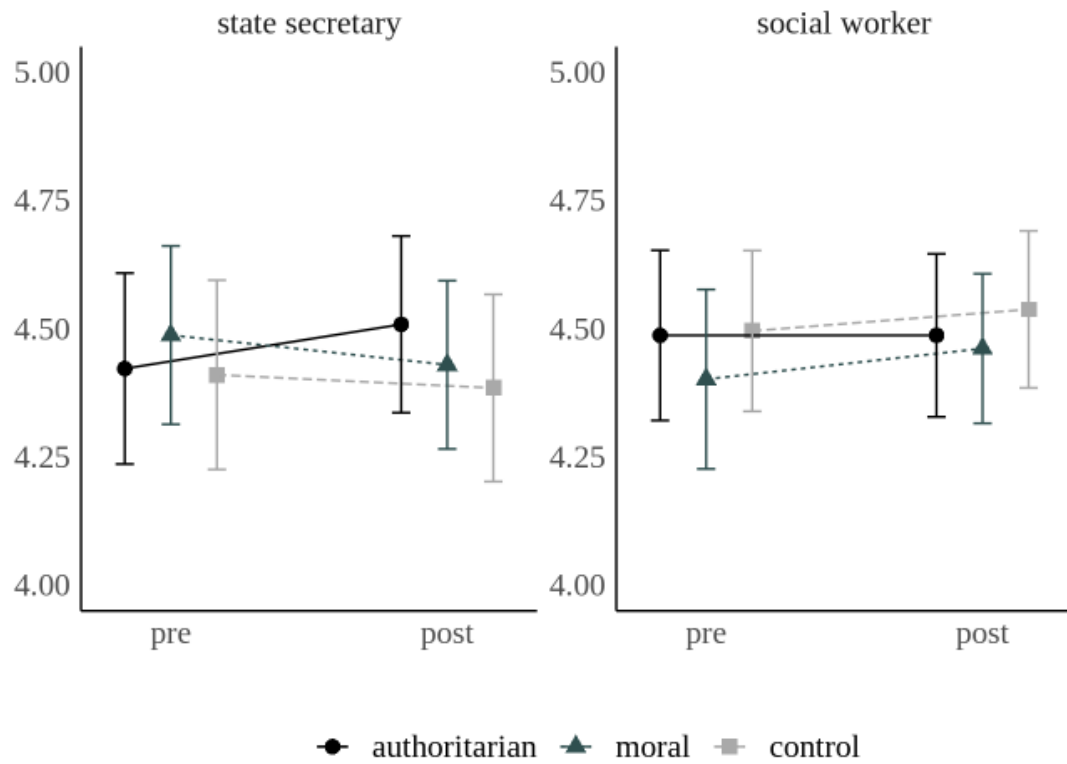

Item 7: I abstain from personal contact to older relatives and persons at risk. (*without correction of ceiling effect*)

**Figure S1.** Mean ratings (95% CI) in response to the single items, without correction of the ceiling effects. (*continued*)

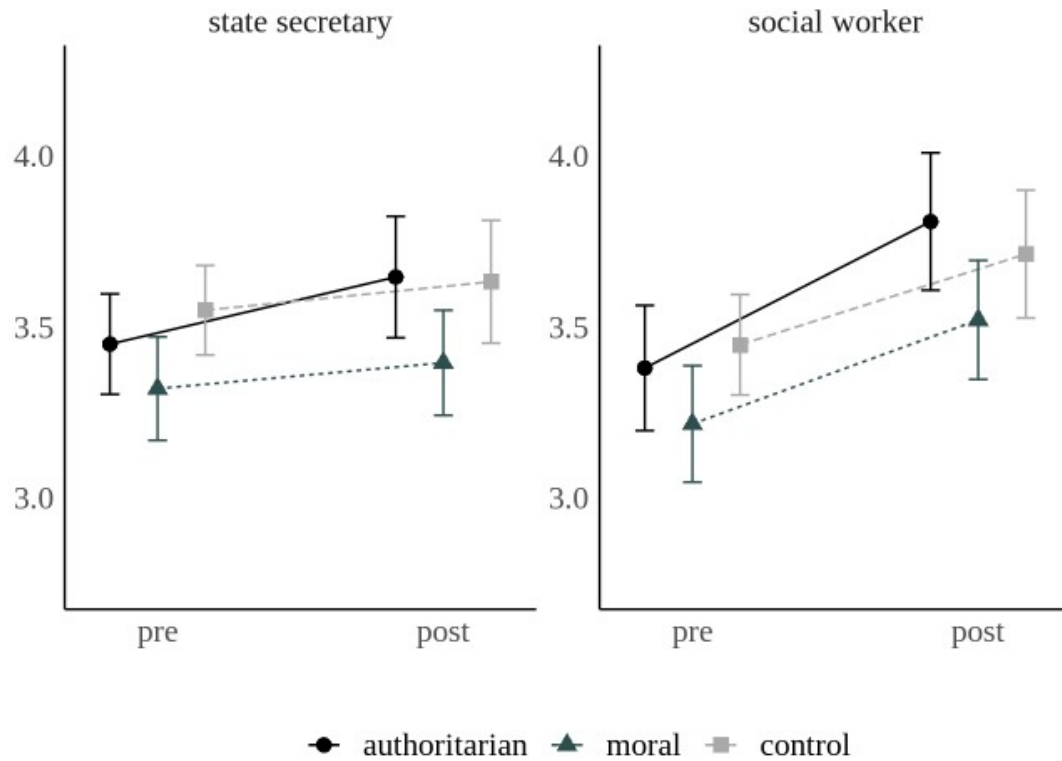

Item 1: I reduce contacts to other people outside the apartment to an absolute minimum. (with correction of ceiling effect)

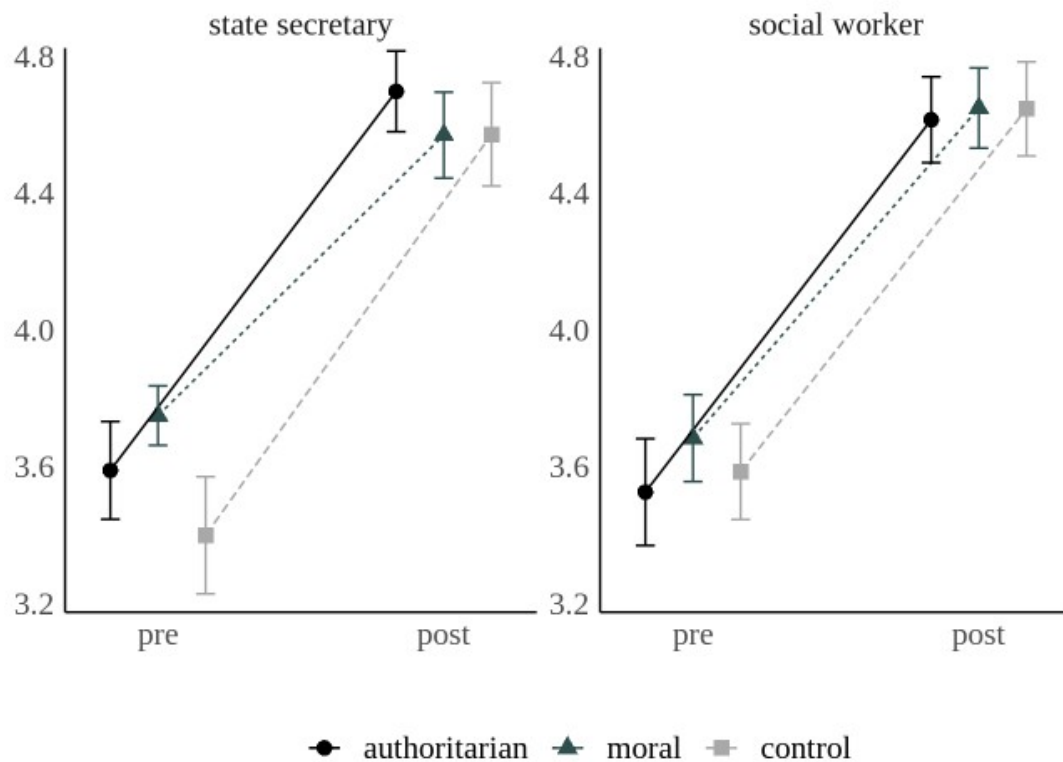

Item 2: I keep a minimum distance of 1.5 meter to other people in public wherever possible. (with correction of ceiling effect)

**Figure S2.** Mean ratings (95% CI) in response to the single items with correction of the ceiling effects.

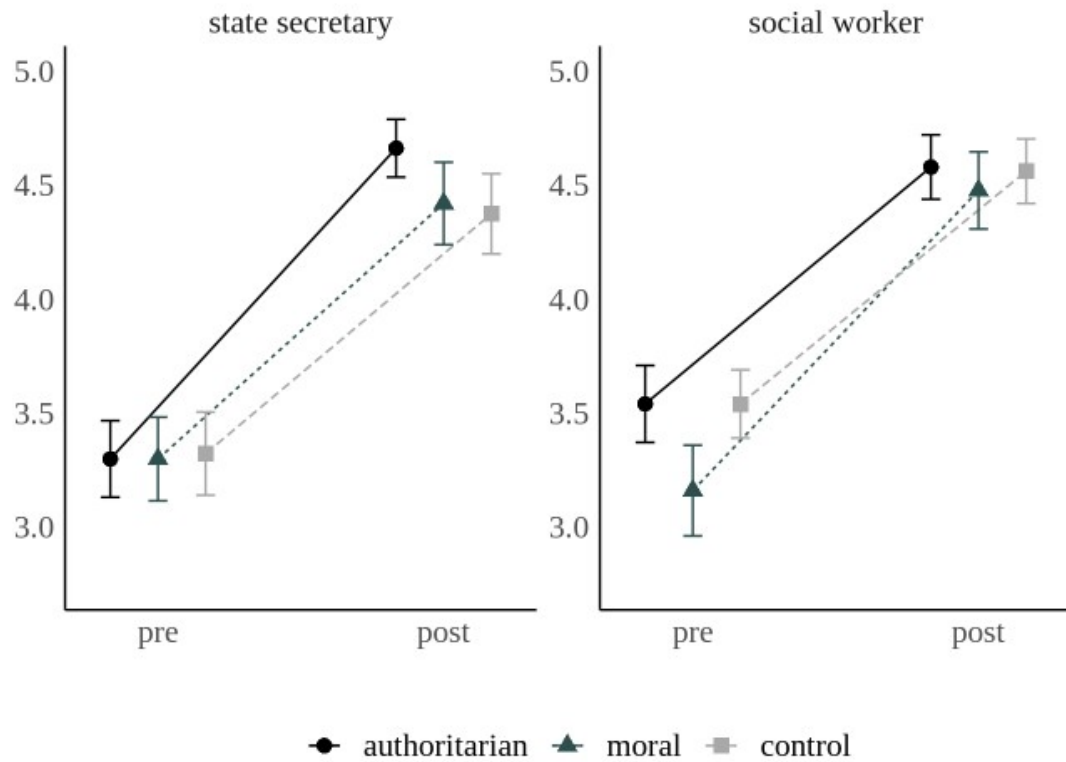

Item 3: I only spend time in public alone, with people of my household, or with one other person. (with correction of ceiling effect)

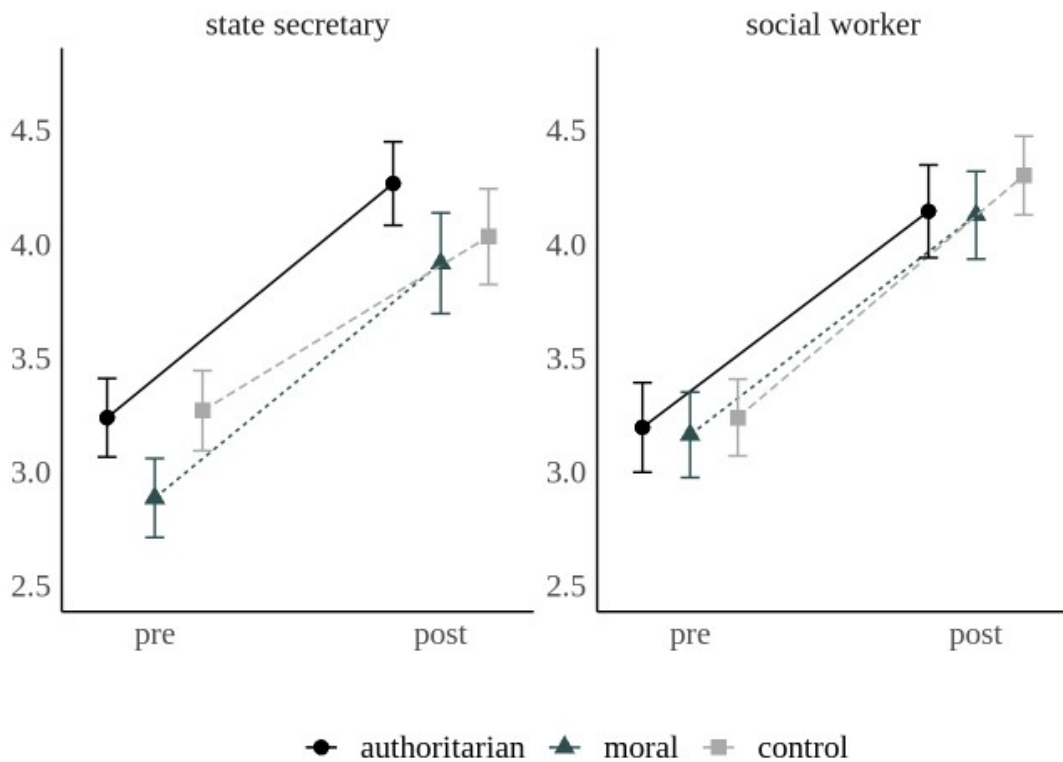

Item 4: There are only very limited reasons for me to leave the house: emergency care, important purchases, doctors visit, necessary work, meetings, exams, sport, physical activity. (with correction of ceiling effect)

**Figure S2.** Mean ratings (95% CI) in response to the single items with correction of the ceiling effects. (continued)

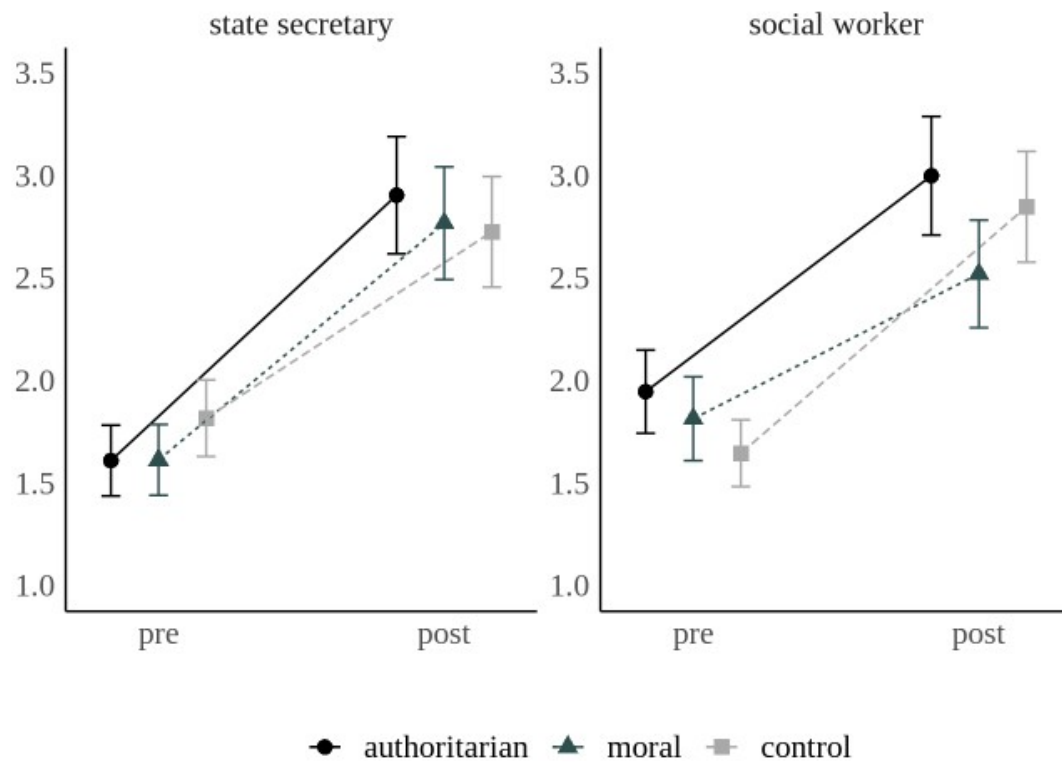

Item 5: I wear a protective mask when I am in other indoor rooms. (with correction of ceiling effect)

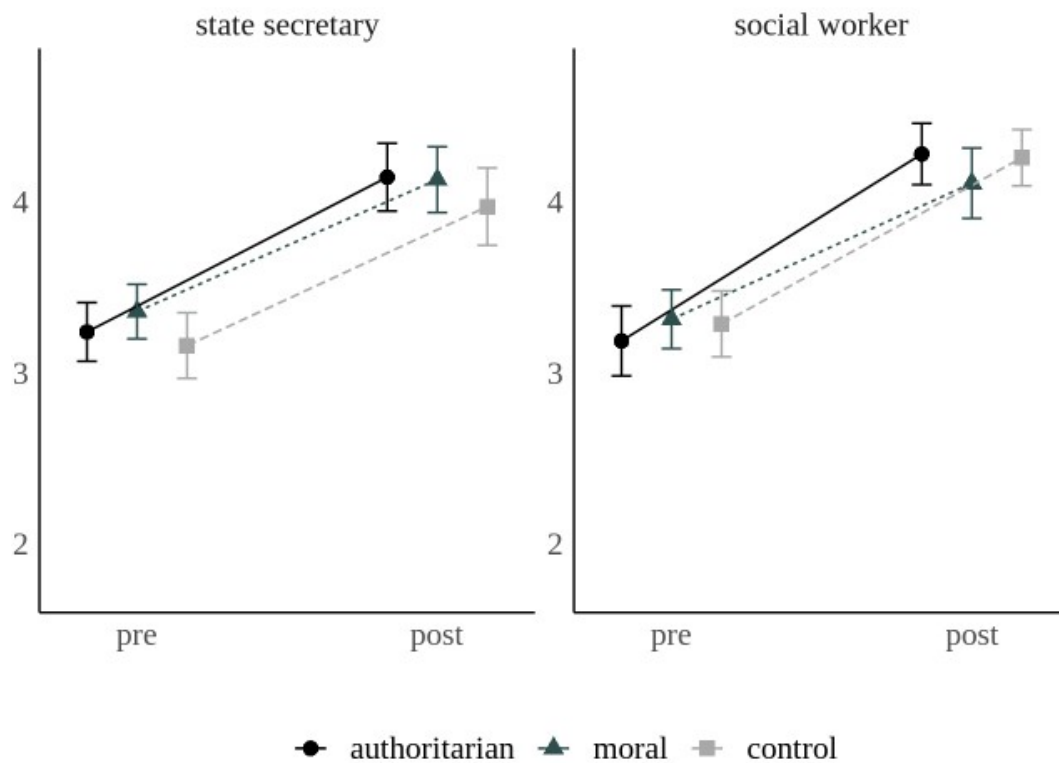

Item 6: For as long as schools and kindergartens are closed, I prevent my children from having any contacts, or I would do this if I had children. (with correction of ceiling effect)

**Figure S2.** Mean ratings (95% CI) in response to the single items with correction of the ceiling effects. (continued)

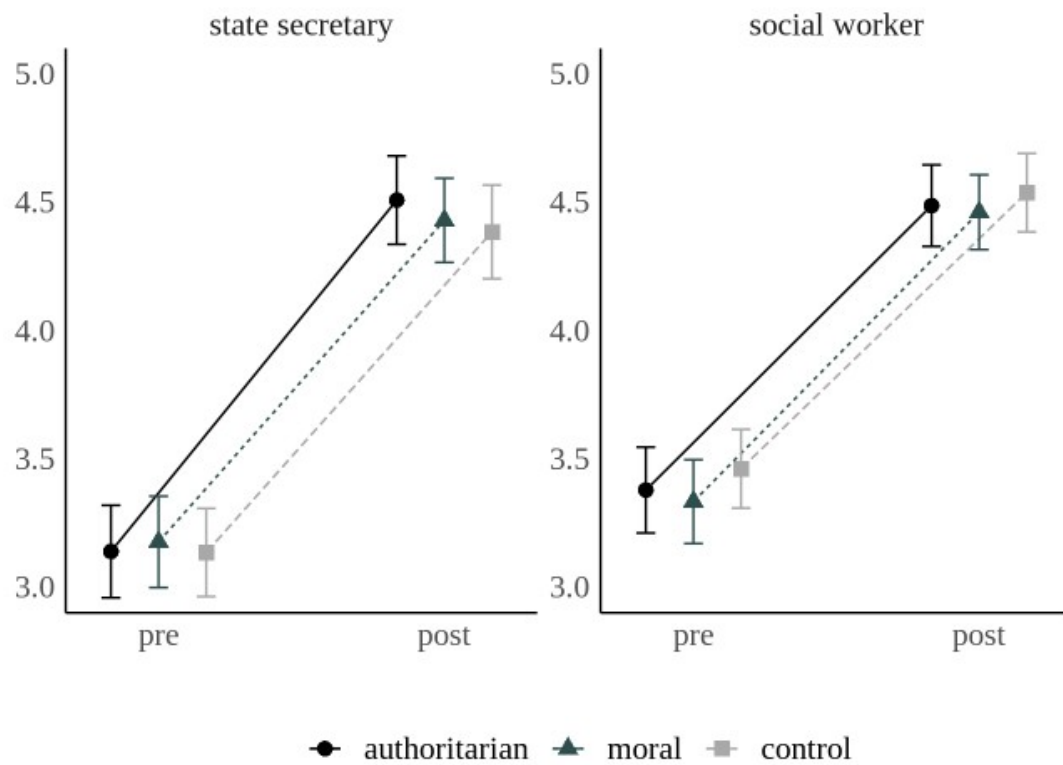

Item 7: I abstain from personal contact to older relatives and persons at risk. (with correction of ceiling effect)

**Figure S2.** Mean ratings (95% CI) in response to the single items with correction of the ceiling effects. (continued)

**Table S5.** Spearman correlations between trait autonomy and average bidirectional pre-post difference (averaged across all seven items) for the different senders (high and low authority) and message types, without correction of ceiling effects.

|                            | high authority:<br>state secretary | low authority:<br>social worker |
|----------------------------|------------------------------------|---------------------------------|
| authoritarian/ controlling | $r = -.02 (n = 116), p = .81$      | $r = -.06 (n = 117), p = .53$   |
| moral/ prosocial           | $r = -.07 (n = 121), p = .47$      | $r = -.01 (n = 117), p = .94$   |
| control                    | $r = -.05 (n = 117), p = .62$      | $r = -.06 (n = 119), p = .52$   |

Note.  $p$  - values are Holm adjusted for multiple tests.

**Table S6.** Regression results using absolute pre-post differences (averaged across all seven items) as the criterion, without correction of ceiling effects ( $R^2 = .04, F(11, 695) = 2.72, p < 0.01$ ).

| Predictor                                             | $b$          | $b$ 95% CI    | $p$         |
|-------------------------------------------------------|--------------|---------------|-------------|
| (Intercept)                                           | 0.49         | [-.24, 1.23]  | 0.19        |
| autonomy                                              | -0.04        | [-.25, 0.16]  | 0.68        |
| sender (social worker)                                | <b>1.23</b>  | [0.20, 2.27]  | <b>0.02</b> |
| message (moral)                                       | 0.79         | [-0.31, 1.89] | 0.16        |
| message (control)                                     | 0.39         | [-0.71, 1.48] | 0.49        |
| autonomy x sender (social worker)                     | <b>-0.32</b> | [-0.61, -.04] | <b>0.03</b> |
| sender (social worker) x message (moral)              | -1.15        | [-2.66, 0.36] | 0.13        |
| sender (social worker) x message (control)            | -1.45        | [-2.94, 0.04] | 0.06        |
| autonomy x message (moral)                            | -0.21        | [-.52, 0.09]  | 0.16        |
| autonomy x message (control)                          | -0.09        | [-0.41, 0.21] | 0.53        |
| autonomy x sender (social worker) x message (moral)   | 0.30         | [-0.12, 0.72] | 0.16        |
| autonomy x sender (social worker) x message (control) | 0.38         | [-0.04, 0.79] | 0.07        |

Note.  $b$  represents unstandardized regression weights. Square brackets are used to enclose the lower and upper limits of a confidence interval.

**Table S7.** Spearman correlations between trait autonomy and average absolute pre-post difference (averaged across all seven items) for the different senders (high and low authority) and message types, with correction of ceiling effects.

|                            | high authority:<br>state secretary | low authority:<br>social worker                 |
|----------------------------|------------------------------------|-------------------------------------------------|
| authoritarian/ controlling | $r = -.01 (n = 107), p = .91$      | $r = -.16 (n = 109), p = .09$                   |
| moral/ prosocial           | $r = -.09 (n = 109), p = .35$      | <b><math>r = -.19 (n = 113), p = .04</math></b> |
| control                    | $r = .01 (n = 111), p = .93$       | $r = .03 (n = 107), p = .78$                    |

Note.  $p$  - values are Holm adjusted for multiple tests.

**Table S8.** Spearman correlations between trait autonomy and average bidirectional pre-post difference (averaged across all seven items) for the different senders (high and low authority) and message types, with correction of ceiling effects.

|                  | high authority:<br>state secretary | low authority:<br>social worker |
|------------------|------------------------------------|---------------------------------|
| authoritarian    | $r = .04 (n = 107), p = .67$       | $r = 0.02 (n = 109), p = .85$   |
| moral/ prosocial | $r = .06 (n = 109), p = .51$       | $r = 0.01 (n = 113), p = .91$   |
| control          | $r = -.09 (n = 111), p = .36$      | $r = .01 (n = 107), p = .92$    |

Note.  $p$  - values are Holm adjusted for multiple tests.

**Table S9.** Regression results using absolute pre-post differences (averaged across all seven items) as criterion, with correction of ceiling effects ( $R^2 = .01$ ,  $F(11, 644) = 0.01$ ,  $p = 0.75$ ).

| Predictor                                             | <i>b</i> | <i>b</i> 95% CI | <i>p</i> |
|-------------------------------------------------------|----------|-----------------|----------|
| (Intercept)                                           | 0.54     | [-0.76, 1.84]   | 0.41     |
| autonomy                                              | 0.04     | [-0.32, 0.40]   | 0.82     |
| sender (social worker)                                | 1.19     | [-0.64, 3.01]   | 0.20     |
| message (moral)                                       | 0.54     | [-1.40, 2.49]   | 0.58     |
| message (control)                                     | -0.49    | [-2.41, 1.44]   | 0.62     |
| autonomy x sender (social worker)                     | -0.35    | [-0.85, 0.16]   | 0.17     |
| sender (social worker) x message (moral)              | -0.85    | [-3.51, 1.81]   | 0.53     |
| sender (social worker) x message (control)            | -0.66    | [-3.32, 2.00]   | 0.63     |
| autonomy x message (moral)                            | -0.18    | [-0.72, 0.36]   | 0.51     |
| autonomy x message (control)                          | 0.12     | [-0.42, 0.66]   | 0.66     |
| autonomy x sender (social worker) x message (moral)   | 0.27     | [-0.47, 1.00]   | 0.48     |
| autonomy x sender (social worker) x message (control) | 0.22     | [-0.53, 0.96]   | 0.57     |

*Note.* *b* represents unstandardized regression weights. Square brackets are used to enclose the lower and upper limits of a confidence interval.
